# Supplementary material for: Application of the Hydrodeoxygenation of Black Soldier Fly Larvae Lipids in Green Diesel Production
Source: MDPI journal article supplement (doi:10.3390/su16020584), 2024-01-09
Supplement: s1 [file s1]

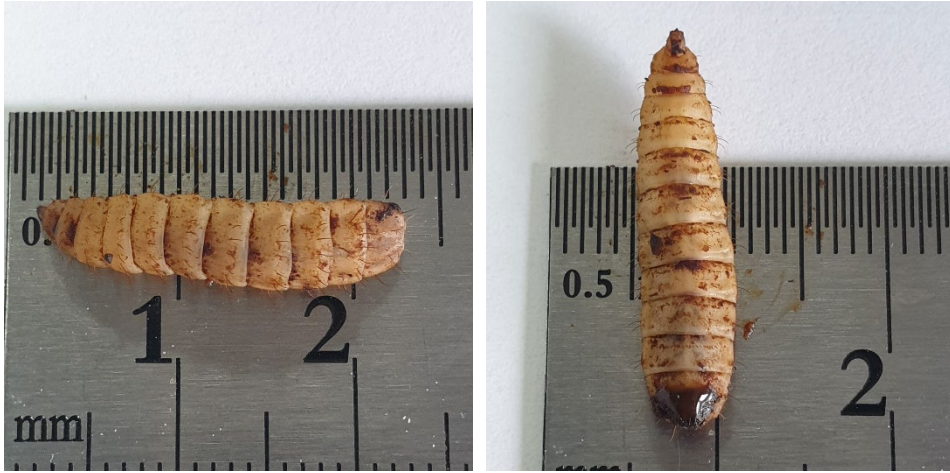

**Figure S1.** Photographs of Black soldier fly larvae (*Hermetia illucens*)

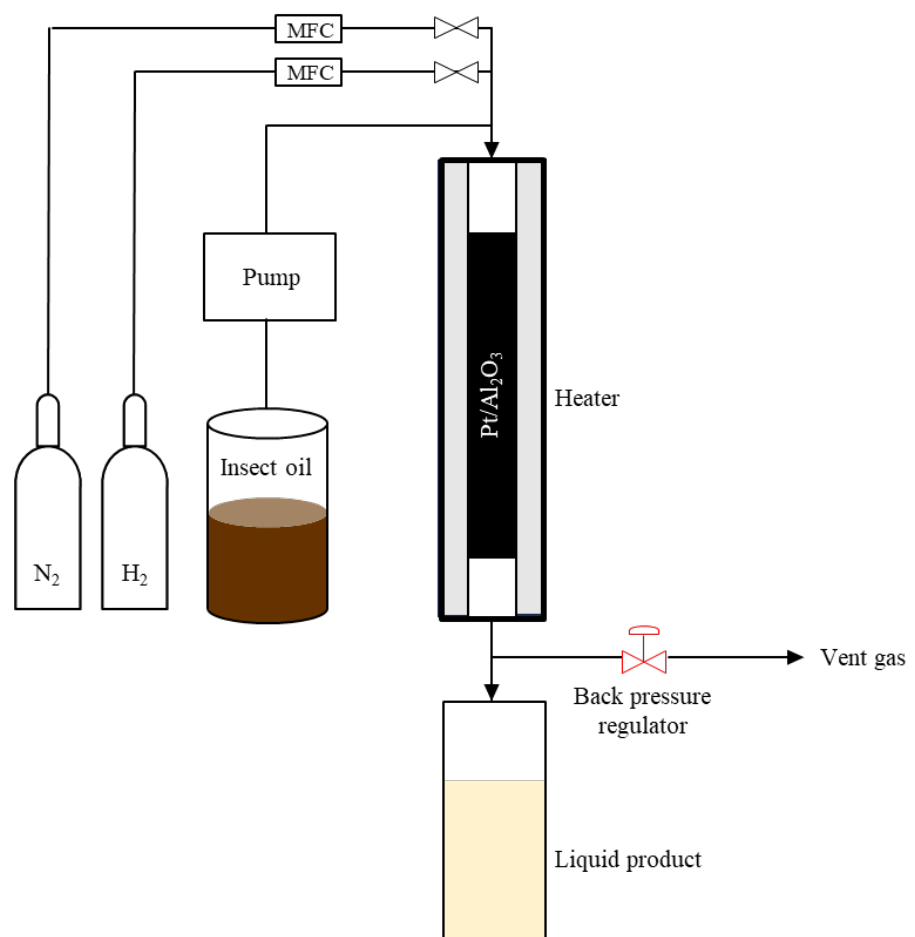

**Figure S2.** Experimental apparatus.

(a)

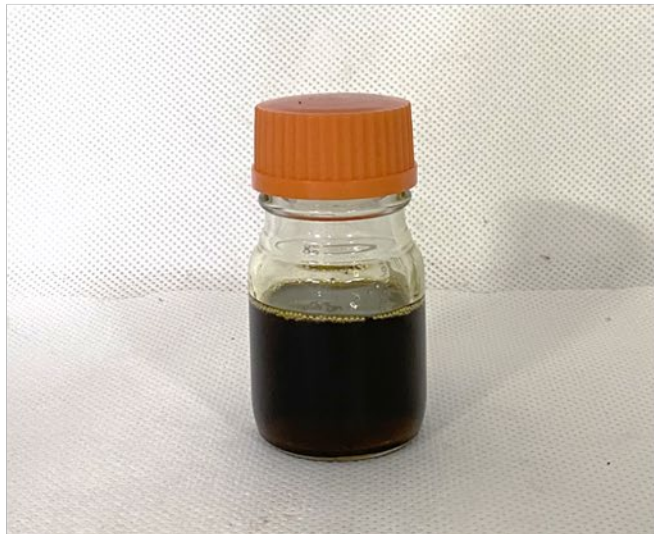

(b)

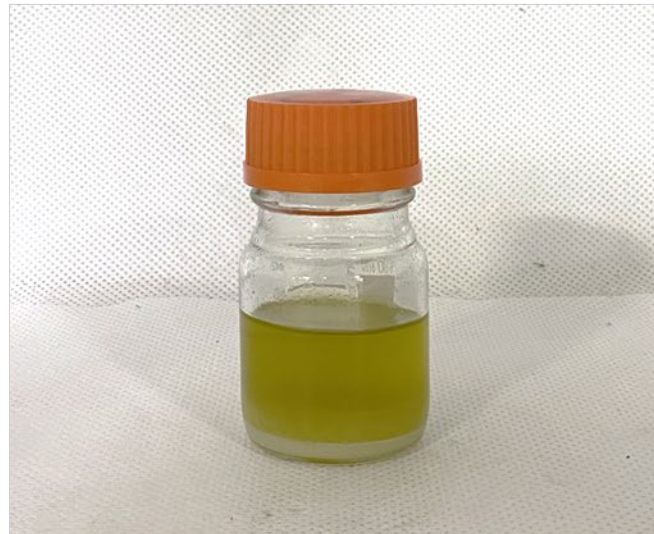

**Figure S3.** Photographs of (a) BSFL lipid and (b) Hydrotreated BSFL oil.
